# Supplementary material for: miR-486 is modulated by stretch and increases ventricular growth
Source: JCI journal article supplement (doi:10.1172/jci.insight.125507), 2019-09-12

fully unedited gel for Figure 5C

STAT1

pSTAT1-S727

GAPDH

corresponding Ponceau  
stained membranes

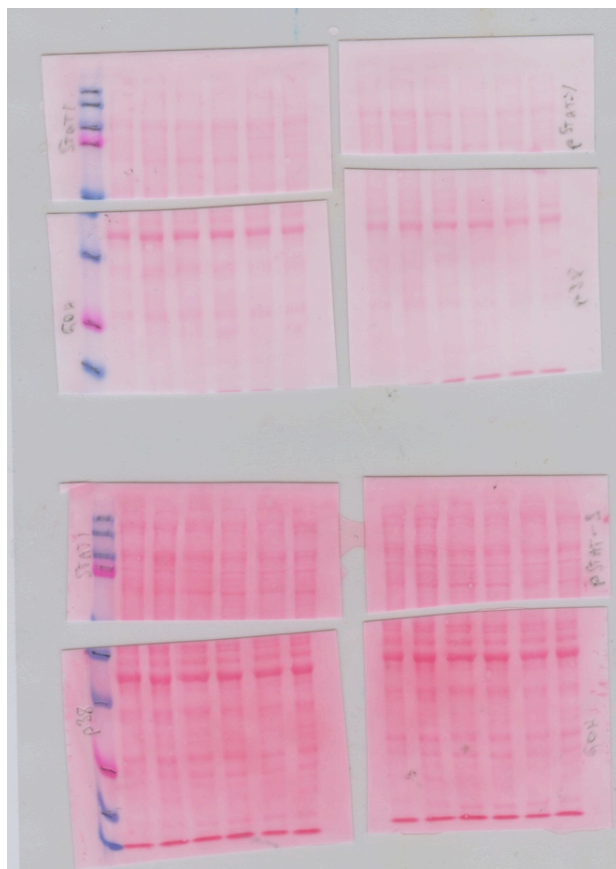

Stat1

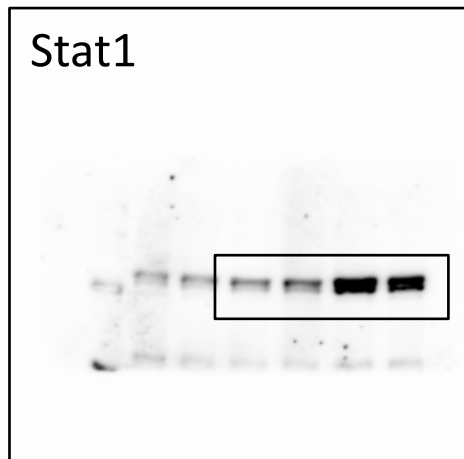

p-Stat1

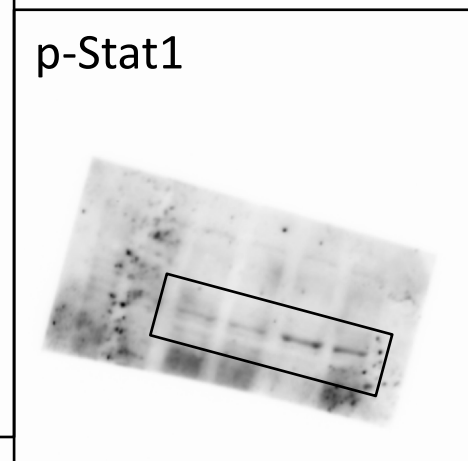

GAPDH

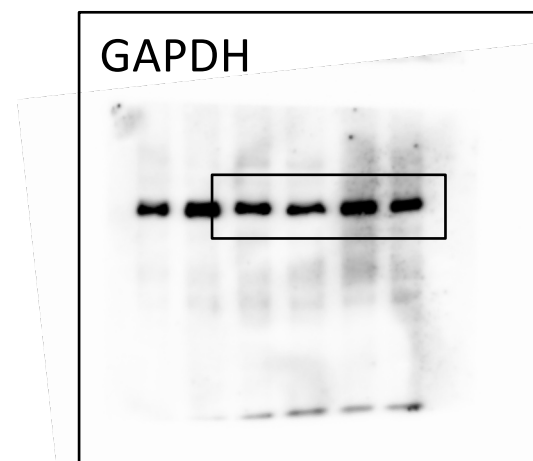



fully unedited gel for Figure 5C

STAT3

JAK1

corresponding Ponceau  
stained membranes

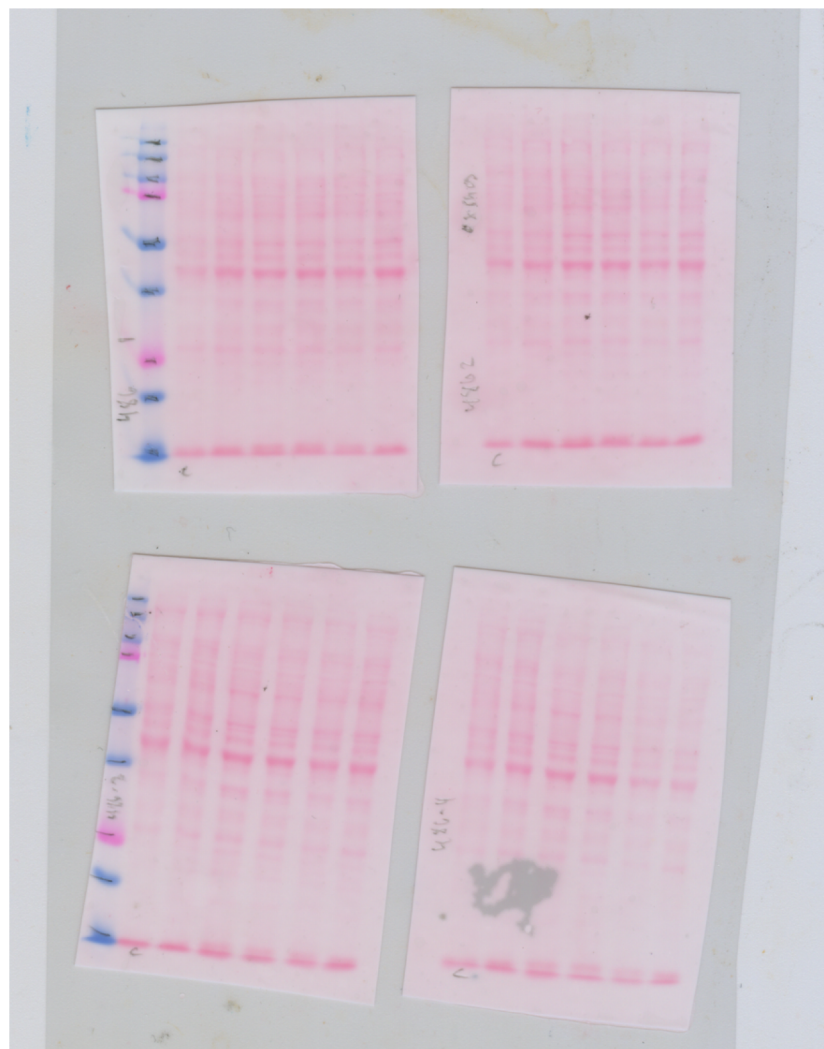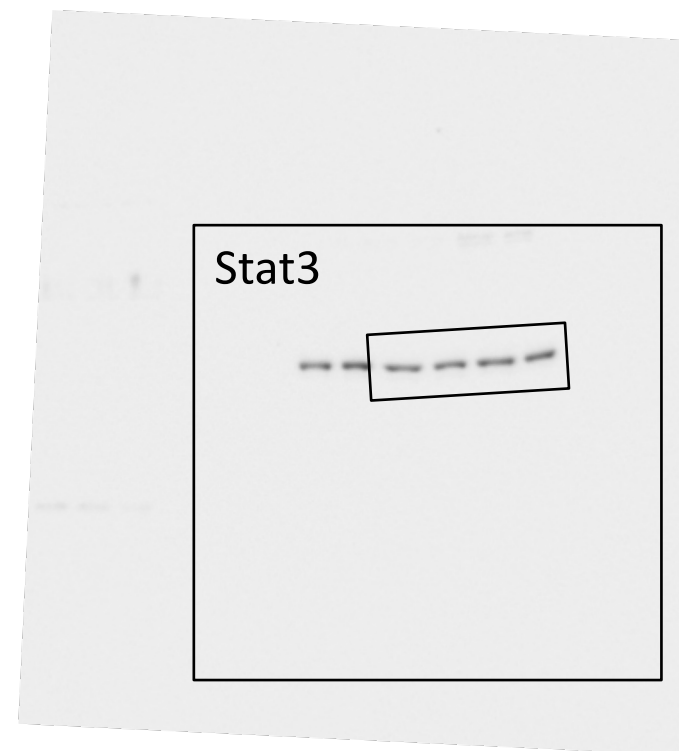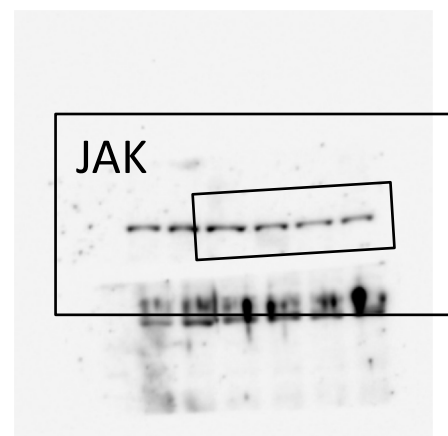



fully unedited membranes for Figure 5D and 6A  
NMC transfected with blockIT control (3x) or  
mir486 (3x)

corresponding Ponceau  
stained membranes

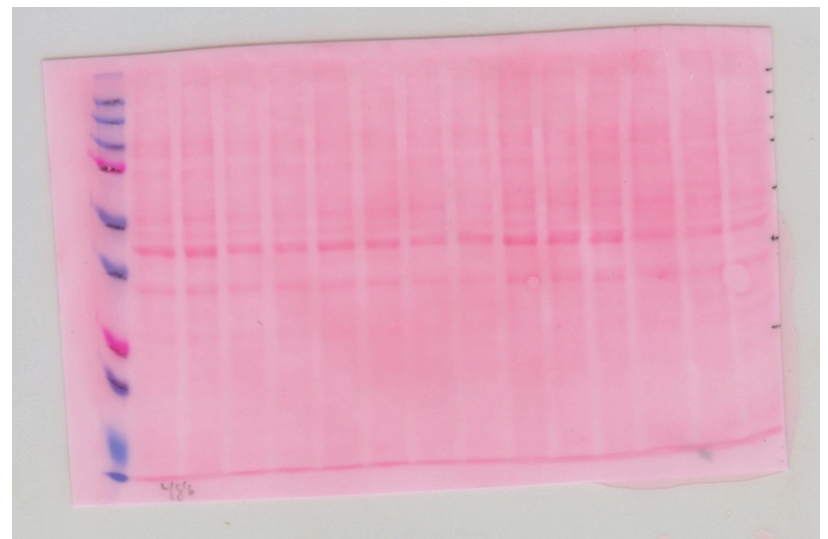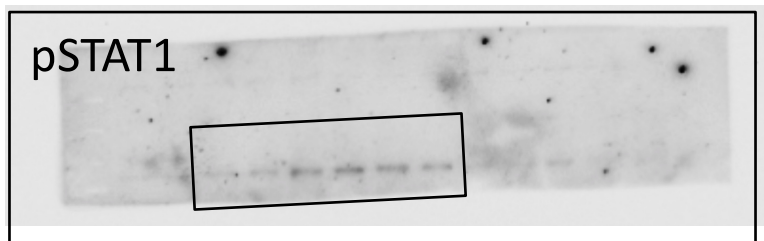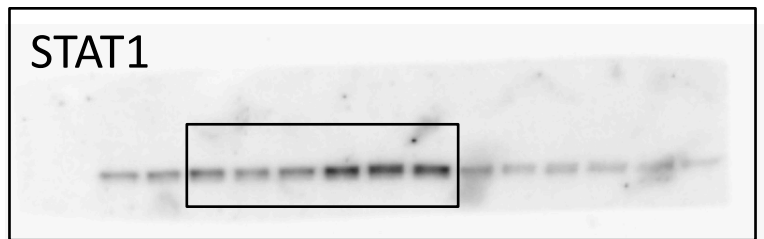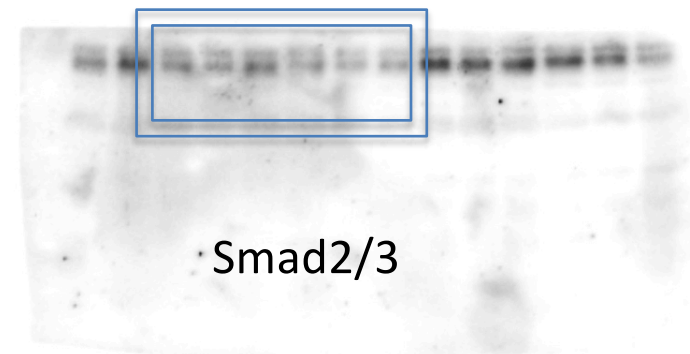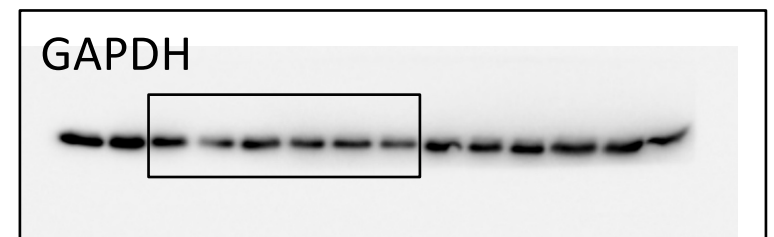



fully unedited gel for Figure 6D

STAT1

pSTAT1 (Ser727)

NMC control (4x) and treated with TGFb2 (3x)

corresponding Ponceau  
stained membranes

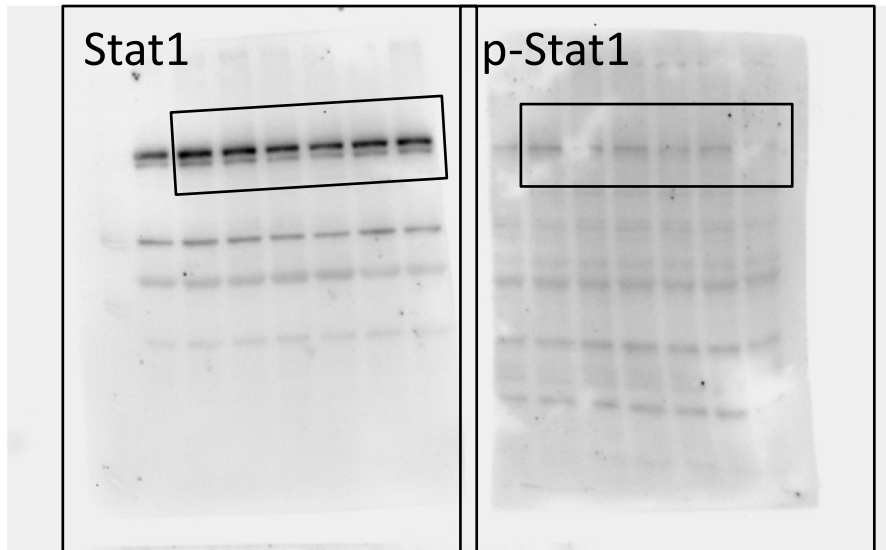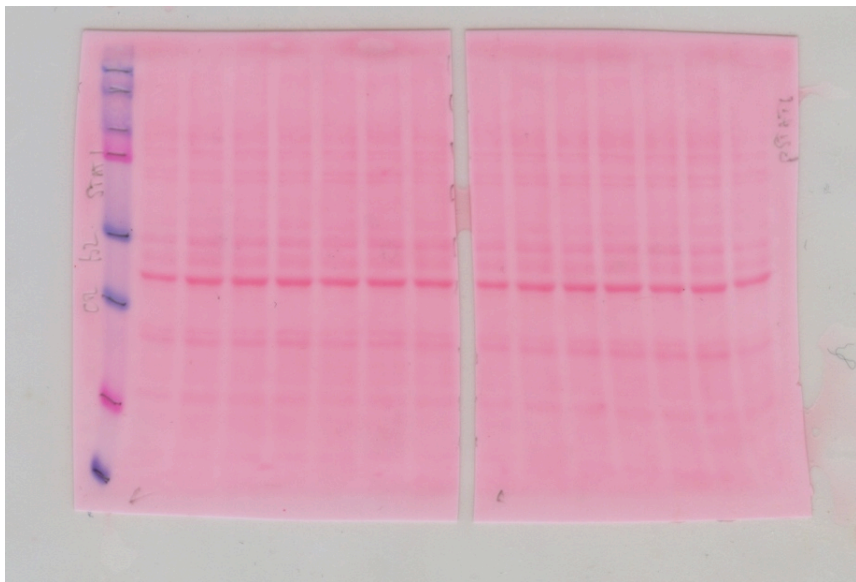



fully unedited gel for Figure 7A

SRF

Gata4

NMC control (3x) and treated with miR486 (3x)

corresponding Ponceau  
stained membranes

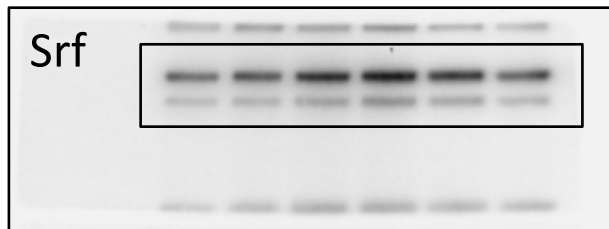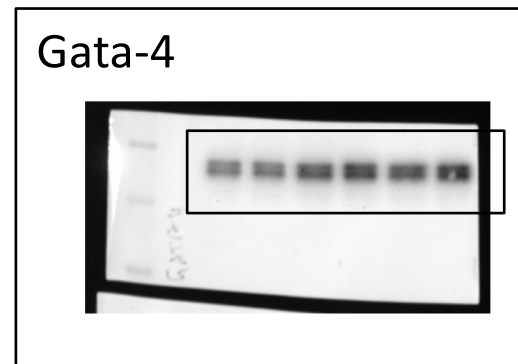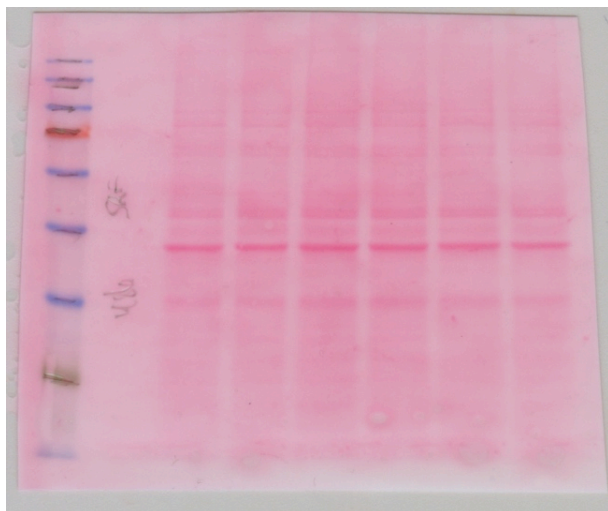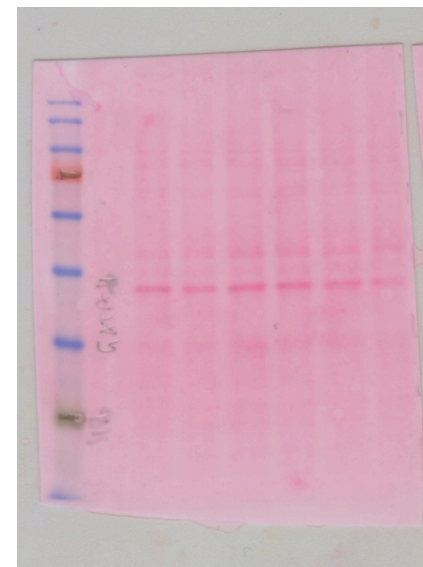



Stat1

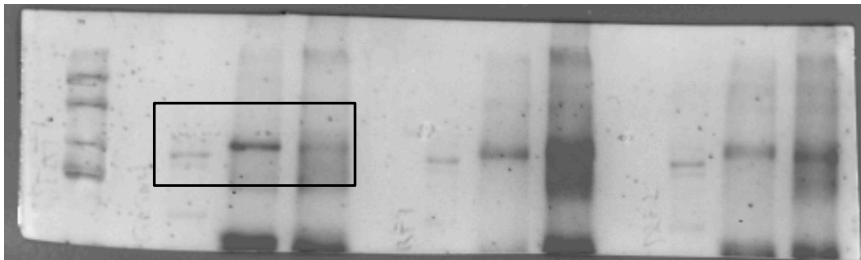

Gata4

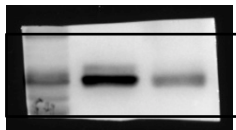

Stat1

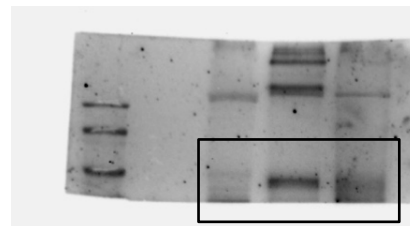

SRF

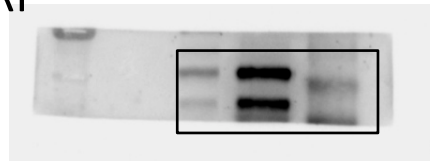

fully unedited gel for  
Figure 7B, C  
STAT1  
IP Gata-4 or SRF  
corresponding  
Ponceau  
stained membranes

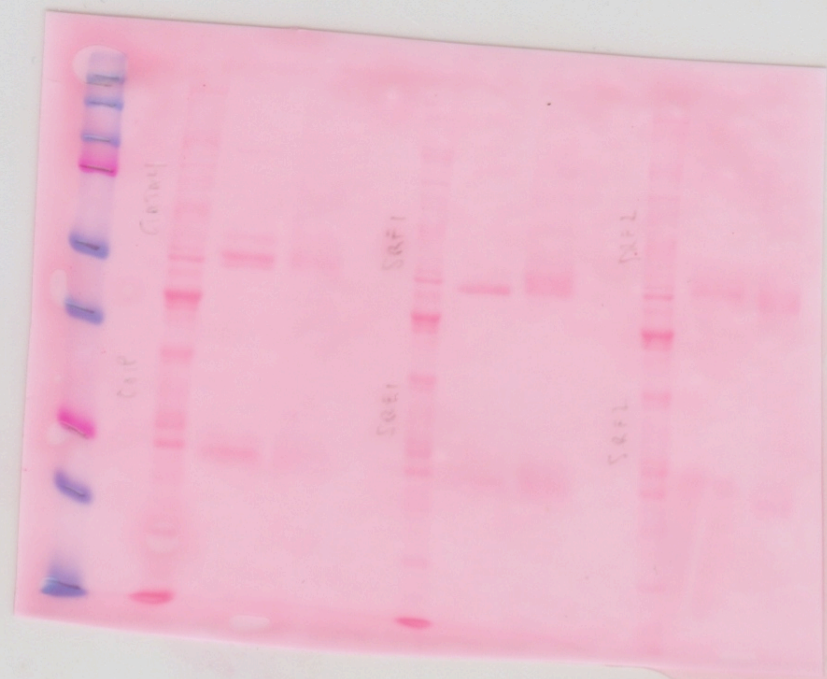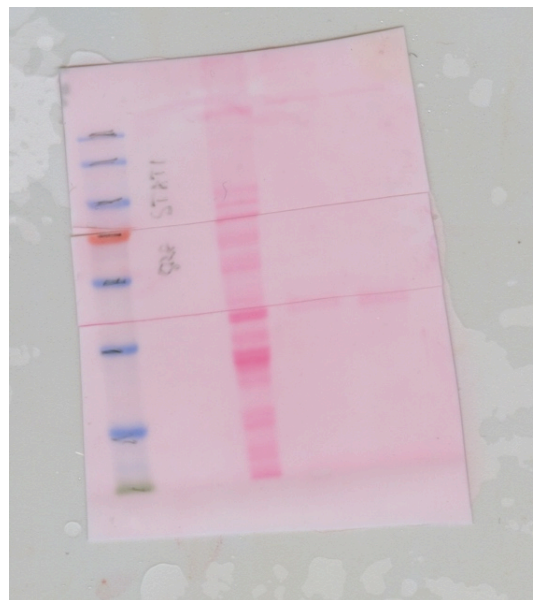



PTEN

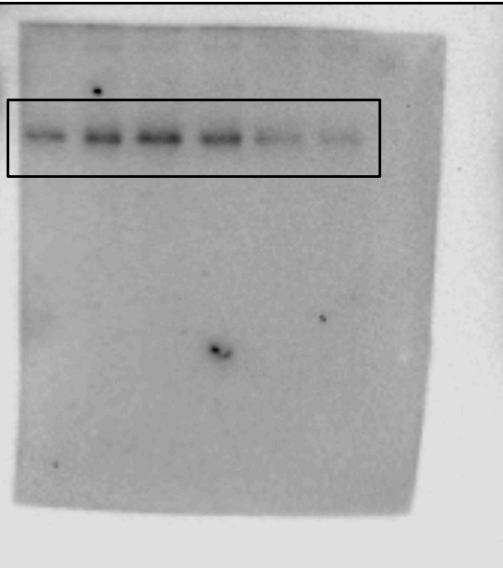

FoxO1

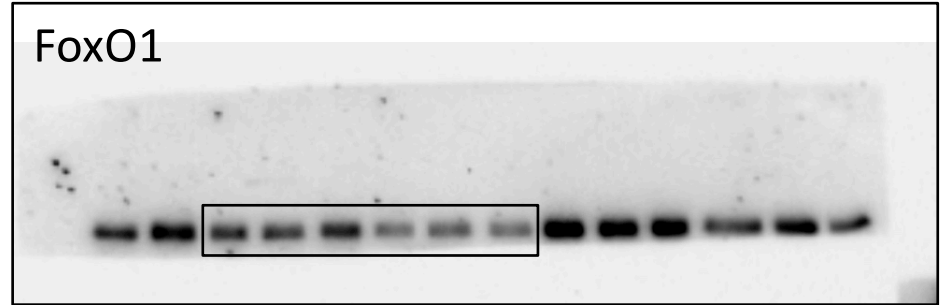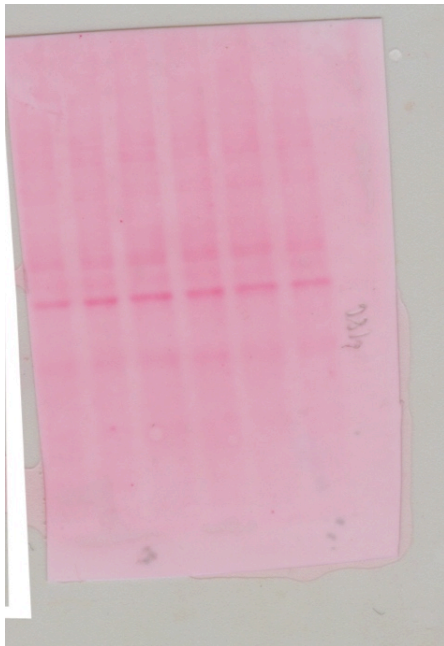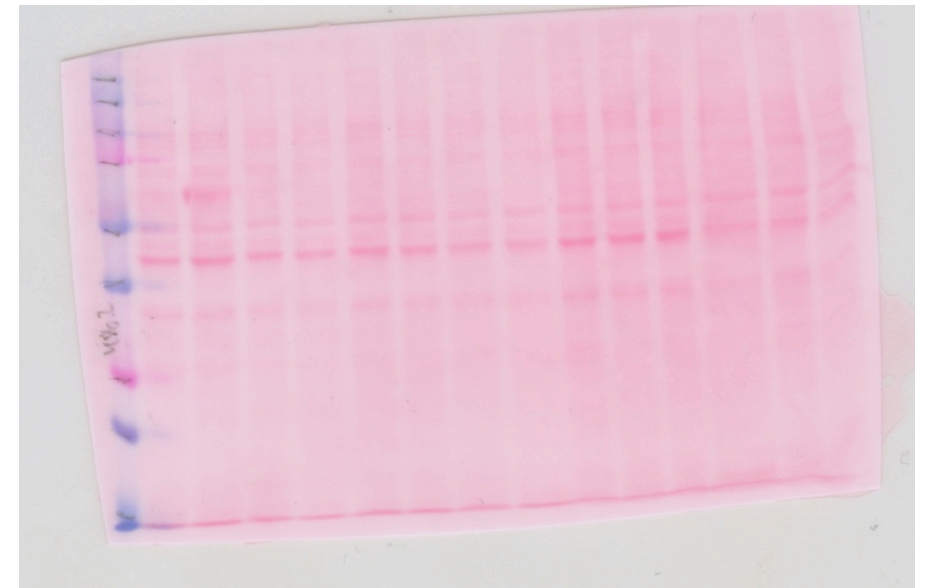

fully unedited gel for Supplemental  
Figure 1A

PTEN and Foxo-1

NMC control (3x) and treated with  
miR486 (3x)

corresponding Ponceau  
stained membranes



titin T11 – shorter exposure

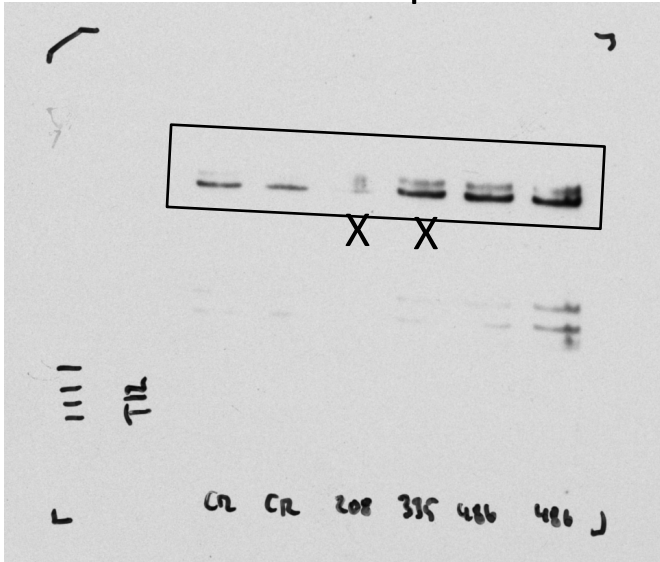

titin T11 – longer exposure

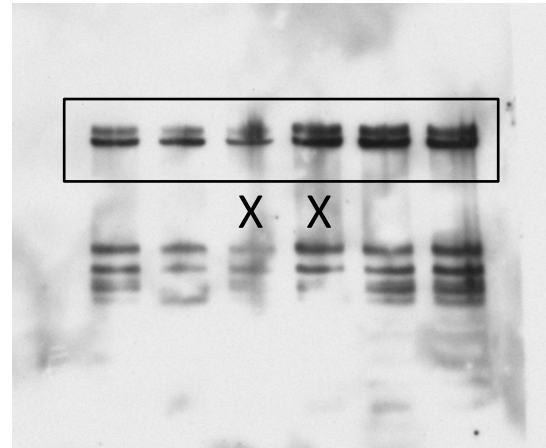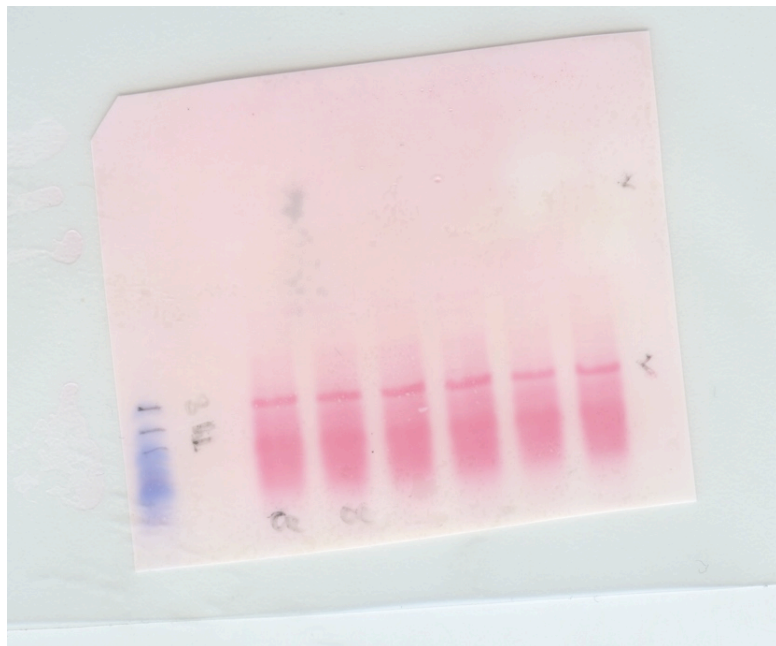

fully unedited gel for Supplemental Figure 1C

titin

NMC control (2x left side) and treated with miR486 (2x right side)

2 center lanes marked with 'X' were cut (other miRNA's)

corresponding Ponceau stained membranes



fully unedited gel for Supplemental Figure 1C

troponin-I, myosin heavy chain,  
alpha-actinin-2  
cardiac actin

NMC control (3x) and treated with  
miR486 (3x)  
corresponding Ponceau  
stained membranes

cardiac actin

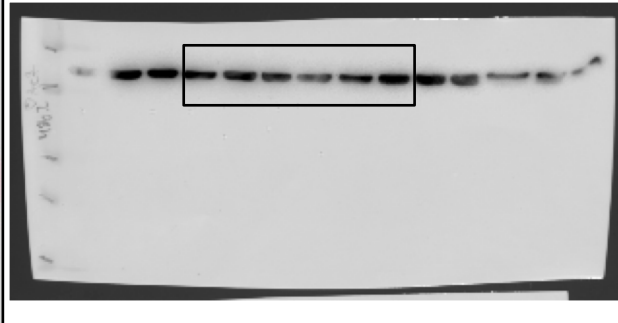

TNI

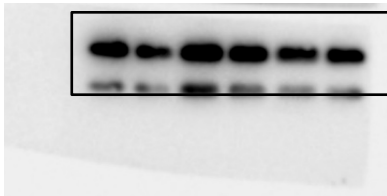

myosin (1025)

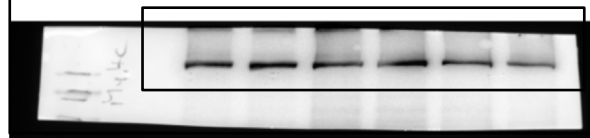

Actinin (sarcomeric)

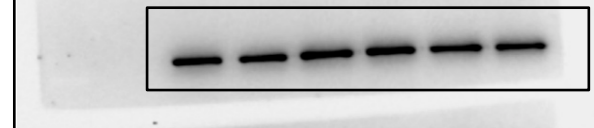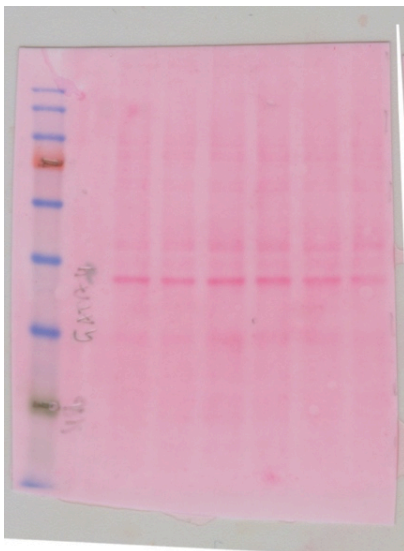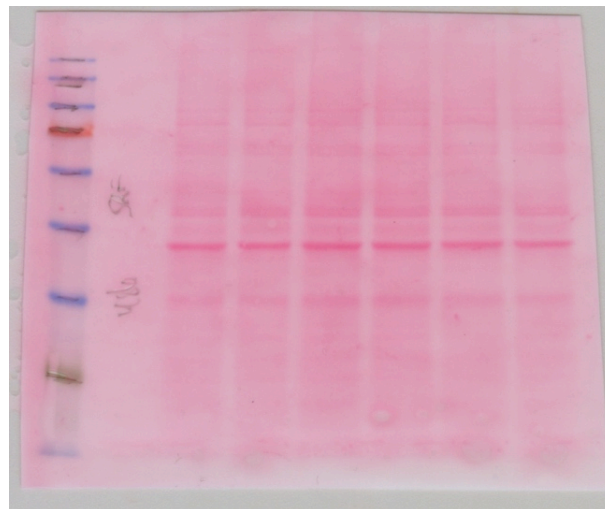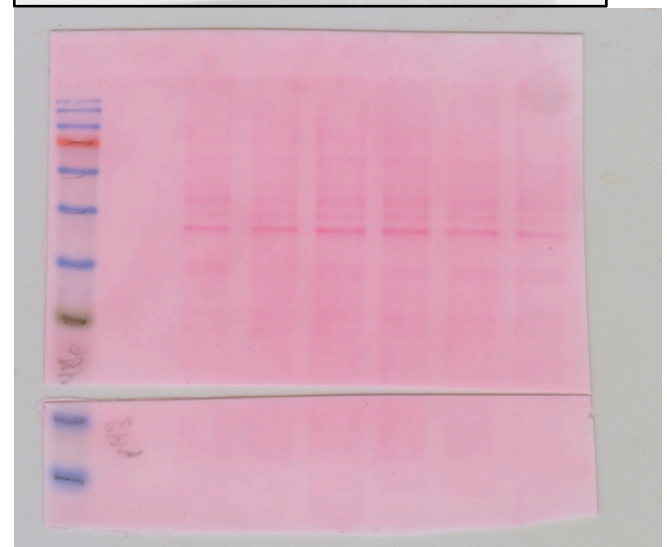

Supplement: sd1 [file 1]
